# Supplementary material
Source: publisher figshare collection journal article supplement (https://wiley.figshare.com/articles/dataset/_/3555609)
Supplement: Supplementary file 1 [file 1]

McClintock, B. T., D. J. F. Russell, J. Matthiopoulos, and R. King. 2012. Combining individual animal movement and ancillary biotelemetry data to investigate population-level activity budgets. *Ecology*.

## APPENDIX C

### *Posterior summaries for the harbor seal example*

Table C1. Marginal posterior summaries for a Bayesian analysis of harbor seal activity budgets utilizing both location and diving data. Where applicable, subscripts indicate movement behavior states ( $R$  = resting,  $F$  = foraging, and  $T$  = transit) and sex (1 = male, 2 = female).

|                            |          | 95% HPDI |       |
|----------------------------|----------|----------|-------|
| Parameter                  | Estimate | Lower    | Upper |
| <u>Movement parameters</u> |          |          |       |
| $r_{R,1}$                  | 0.12     | 0.00     | 0.34  |
| $r_{F,1}$                  | 0.12     | 0.00     | 0.35  |
| $r_{T,1}$                  | 1.14     | 0.97     | 1.39  |
| $r_{R,2}$                  | 0.15     | 0.00     | 0.46  |
| $r_{F,2}$                  | 0.15     | 0.00     | 0.45  |
| $r_{T,2}$                  | 1.14     | 0.97     | 1.47  |
| $\alpha_{R,1}$             | 7.45     | 7.05     | 7.84  |
| $\alpha_{F,1}$             | 7.95     | 7.58     | 8.35  |

|                           |      |       |      |
|---------------------------|------|-------|------|
| $\alpha_{T,1}$            | 8.89 | 8.54  | 9.24 |
| $\alpha_{R,2}$            | 7.24 | 6.75  | 7.78 |
| $\alpha_{F,2}$            | 7.79 | 7.32  | 8.27 |
| $\alpha_{T,2}$            | 8.83 | 8.35  | 9.33 |
| $\beta_{R,1}$             | 0.36 | 0.01  | 0.74 |
| $\beta_{F,1}$             | 0.47 | 0.13  | 0.85 |
| $\beta_{T,1}$             | 1.27 | 0.96  | 1.61 |
| $\beta_{R,2}$             | 1.13 | 0.65  | 1.60 |
| $\beta_{F,2}$             | 0.46 | -0.03 | 0.96 |
| $\beta_{T,2}$             | 1.30 | 0.93  | 1.61 |
| $\sigma_{r_{R,1}}^2$      | 0.28 | 0.11  | 0.56 |
| $\sigma_{r_{F,1}}^2$      | 0.28 | 0.13  | 0.59 |
| $\sigma_{r_{T,1}}^2$      | 0.29 | 0.11  | 0.57 |
| $\sigma_{r_{R,2}}^2$      | 0.35 | 0.15  | 0.76 |
| $\sigma_{r_{F,2}}^2$      | 0.36 | 0.13  | 0.76 |
| $\sigma_{r_{T,2}}^2$      | 0.35 | 0.14  | 0.76 |
| $\sigma_{\alpha_{R,1}}^2$ | 0.41 | 0.18  | 0.81 |
| $\sigma_{\alpha_{F,1}}^2$ | 0.39 | 0.17  | 0.77 |
| $\sigma_{\alpha_{T,1}}^2$ | 0.29 | 0.12  | 0.57 |

|                                         |        |        |        |
|-----------------------------------------|--------|--------|--------|
| $\sigma_{\alpha_{R,2}}^2$               | 0.52   | 0.22   | 1.14   |
| $\sigma_{\alpha_{F,2}}^2$               | 0.44   | 0.15   | 0.92   |
| $\sigma_{\alpha_{T,2}}^2$               | 0.38   | 0.12   | 0.80   |
| $\sigma_{\beta_{R,1}}^2$                | 0.32   | 0.15   | 0.64   |
| $\sigma_{\beta_{F,1}}^2$                | 0.30   | 0.13   | 0.60   |
| $\sigma_{\beta_{T,1}}^2$                | 0.31   | 0.14   | 0.58   |
| $\sigma_{\beta_{R,2}}^2$                | 0.52   | 0.19   | 1.13   |
| $\sigma_{\beta_{F,2}}^2$                | 0.39   | 0.15   | 0.83   |
| $\sigma_{\beta_{T,2}}^2$                | 0.37   | 0.15   | 0.80   |
| <i><u>Diving parameters</u></i>         |        |        |        |
| $\nu_{R,1}$                             | 1.00   | 1.00   | 1.00   |
| $\delta_{R,1}$                          | 6.26   | 5.99   | 6.53   |
| $\nu_{F,1} = \nu_{T,1}$                 | 9.98   | 9.91   | 10.00  |
| $\delta_{F,1} = \delta_{T,1}$           | 3.39   | 3.33   | 3.43   |
| $\nu_{R,2}$                             | 1.00   | 1.00   | 1.00   |
| $\delta_{R,2}$                          | 9.20   | 8.47   | 9.97   |
| $\nu_{F,2} = \nu_{T,2}$                 | 6.53   | 6.10   | 6.98   |
| $\delta_{F,2} = \delta_{T,2}$           | 2.69   | 2.53   | 2.82   |
| <i><u>Location error parameters</u></i> |        |        |        |
| $\sigma_x$                              | 0.0055 | 0.0055 | 0.0055 |

|                                                |        |        |        |
|------------------------------------------------|--------|--------|--------|
| $\sigma_y$                                     | 0.0034 | 0.0033 | 0.0034 |
| <u>State transition probability parameters</u> |        |        |        |
| $\psi_{R,R,1}$                                 | 0.80   | 0.79   | 0.81   |
| $\psi_{R,F,1}$                                 | 0.17   | 0.16   | 0.18   |
| $\psi_{R,T,1}$                                 | 0.03   | 0.02   | 0.04   |
| $\psi_{F,R,1}$                                 | 0.13   | 0.12   | 0.14   |
| $\psi_{F,F,1}$                                 | 0.81   | 0.80   | 0.82   |
| $\psi_{F,T,1}$                                 | 0.06   | 0.05   | 0.07   |
| $\psi_{T,R,1}$                                 | 0.19   | 0.16   | 0.21   |
| $\psi_{T,F,1}$                                 | 0.19   | 0.16   | 0.22   |
| $\psi_{T,T,1}$                                 | 0.62   | 0.58   | 0.65   |
| $\psi_{R,R,2}$                                 | 0.71   | 0.69   | 0.73   |
| $\psi_{R,F,2}$                                 | 0.29   | 0.26   | 0.31   |
| $\psi_{R,T,2}$                                 | 0.01   | 0.00   | 0.01   |
| $\psi_{F,R,2}$                                 | 0.10   | 0.09   | 0.12   |
| $\psi_{F,F,2}$                                 | 0.85   | 0.84   | 0.86   |
| $\psi_{F,T,2}$                                 | 0.04   | 0.03   | 0.05   |
| $\psi_{T,R,2}$                                 | 0.19   | 0.14   | 0.24   |
| $\psi_{T,F,2}$                                 | 0.24   | 0.18   | 0.30   |
| $\psi_{T,T,2}$                                 | 0.58   | 0.52   | 0.64   |

---

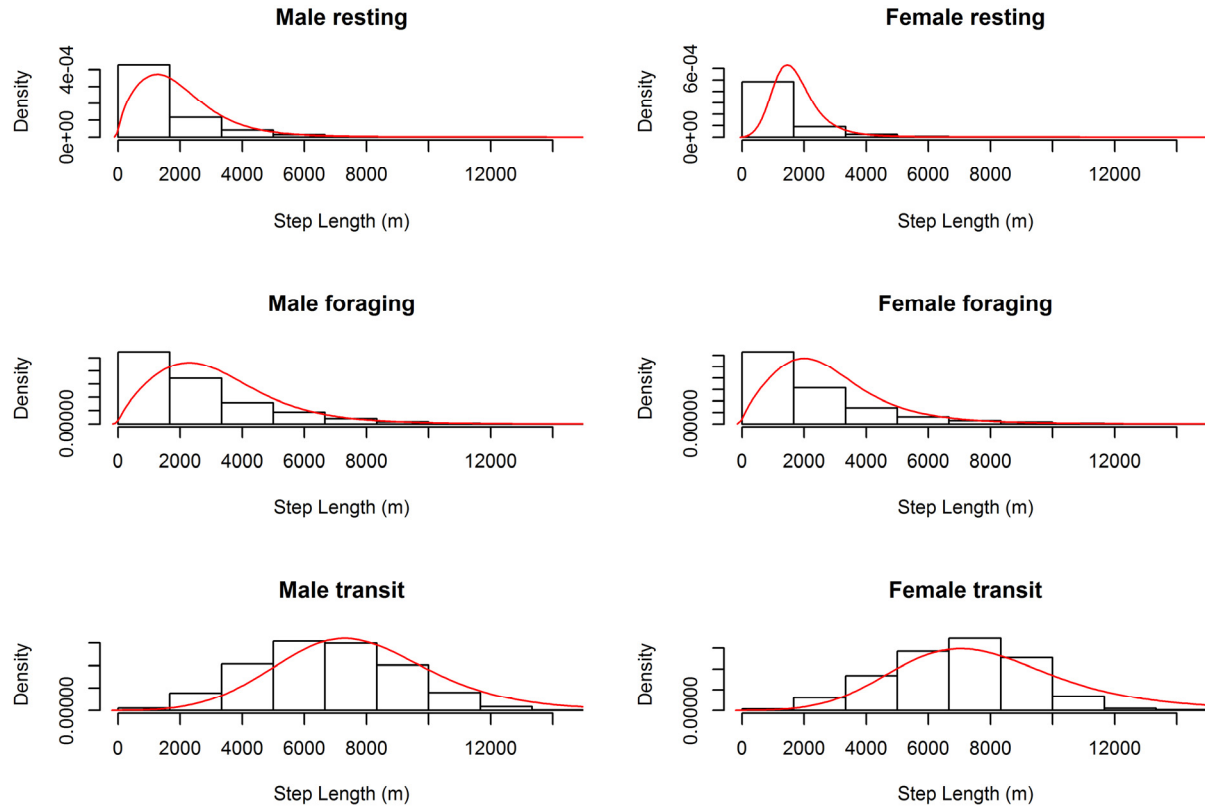

FIG. C1. Posterior histogram of sex- and state-dependent step lengths for 17 harbor seals in the UK. The population-level posterior density of the Weibull distribution for step length is shown in red.

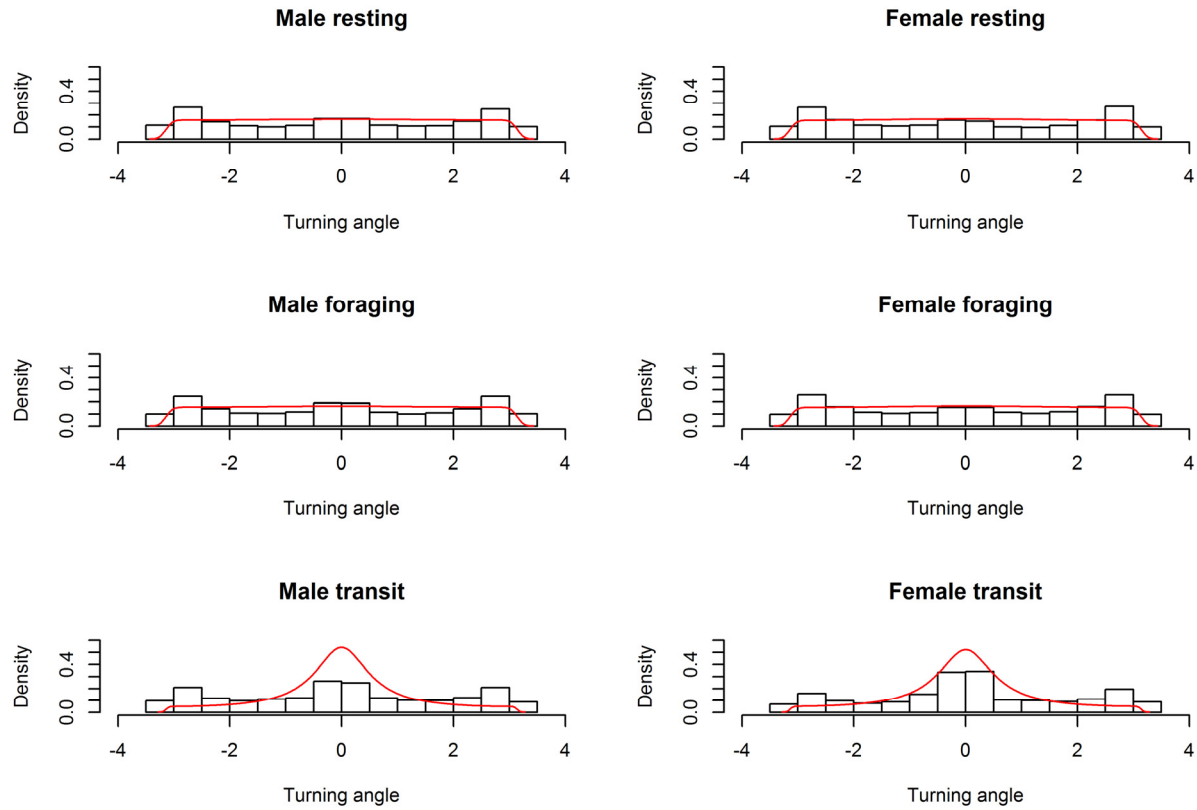

FIG. C2. Posterior histogram of sex- and state-dependent turning angles for 17 harbor seals in the UK. The population-level posterior density of the wrapped Cauchy distribution for turning angle is shown in red.

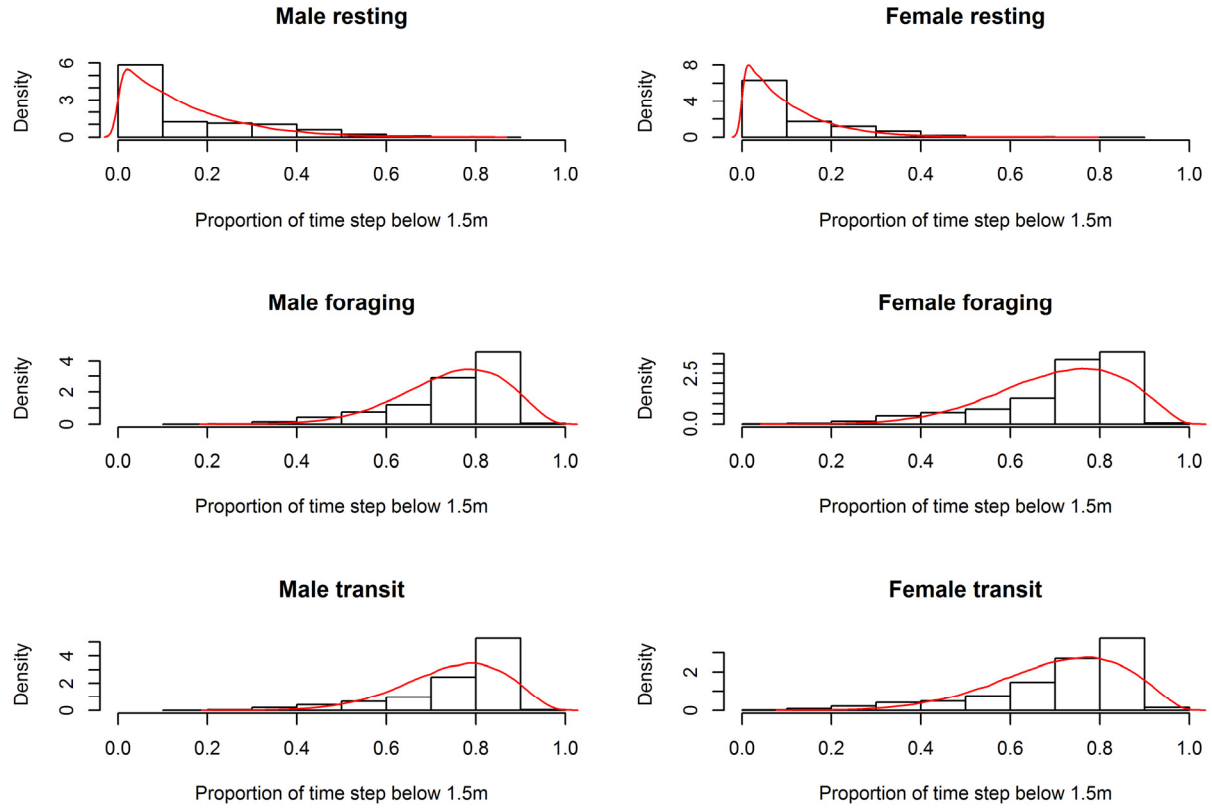

FIG. C3. Posterior histogram of sex- and state-dependent proportions of time step spent diving below 1.5m ( $\omega_{n,t}$ ) for 17 harbor seals in the UK. The population-level posterior density of the Beta distribution for  $\omega_{n,t}$  is shown in red.
